# Supplementary material for: Ionic liquid enhancement of interface compatibility in mixed-linker ZIF-based mixed matrix membranes for advanced CO2/CH4 separation
Source: Royal Society of Chemistry journal article supplement (doi:10.1039/d2ta05767k), 2022-01-01
Supplement: d2ta05767k1.pdf [file d2ta05767k1.pdf]

## Supporting Information for

### **Ionic liquid enhancement of interface compatibility in mixed-linker ZIF-based mixed matrix membranes for advanced CO<sub>2</sub>/CH<sub>4</sub> separation**

Lili Gong <sup>a,b</sup>, Zhili Cai <sup>b</sup>, Qi Wu <sup>b</sup>, Lu Liu <sup>b</sup>, Can Wang <sup>b</sup>, Linglong Shan <sup>b</sup>, Xianghai Meng <sup>a</sup>, Shuangjiang Luo <sup>b,c\*</sup>, Zhichang Liu <sup>a\*</sup>, Suojiang Zhang <sup>b\*</sup>

<sup>a</sup> *State Key Laboratory of Heavy Oil Processing, College of Chemical Engineering and Environment, China University of Petroleum, Beijing, 102249, China*

<sup>b</sup> *CAS Key Laboratory of Green Process and Engineering, State Key Laboratory of Multiphase Complex Systems, Beijing Key Laboratory of Ionic Liquids Clean Process, Institute of Process Engineering, Chinese Academy of Sciences (CAS), Beijing, 100190, China*

<sup>c</sup> *Dalian National Laboratory for Clean Energy, CAS, Dalian, 116023, China*

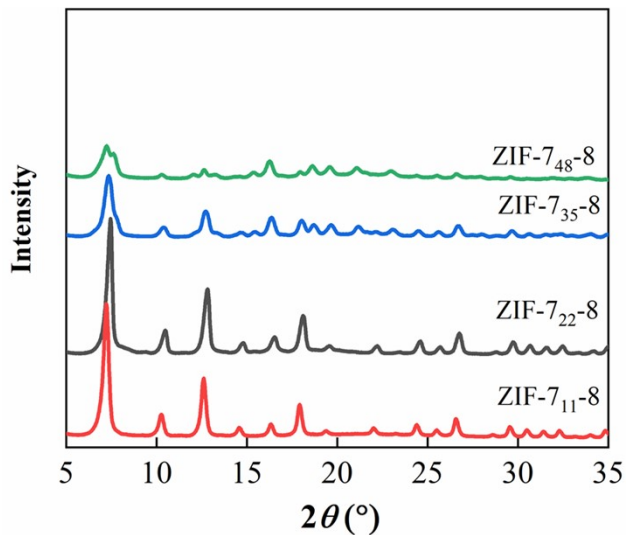

**Fig. S1** The WAXD patterns of ZIF-7-8 nanoparticles

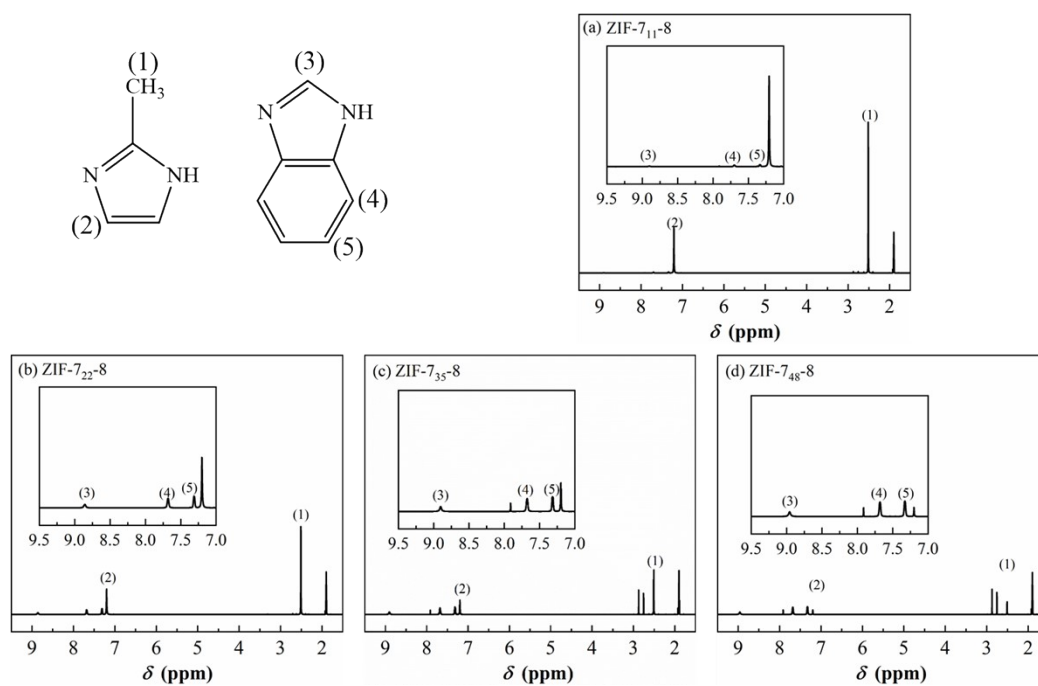

**Fig. S2** Solution  $^1\text{H}$ -NMR spectra of the mixed-linker ZIF-7-8 nanoparticle. Protons of mIm are observed at (1) 2.51 ppm and (2) 7.21 ppm; and protons of bIm are shown at (3) 8.90 ppm, (4) 7.71 ppm, and (5) 7.34 ppm. Deuterated acetic acid- $\text{d}_4$  is used as the solvent.

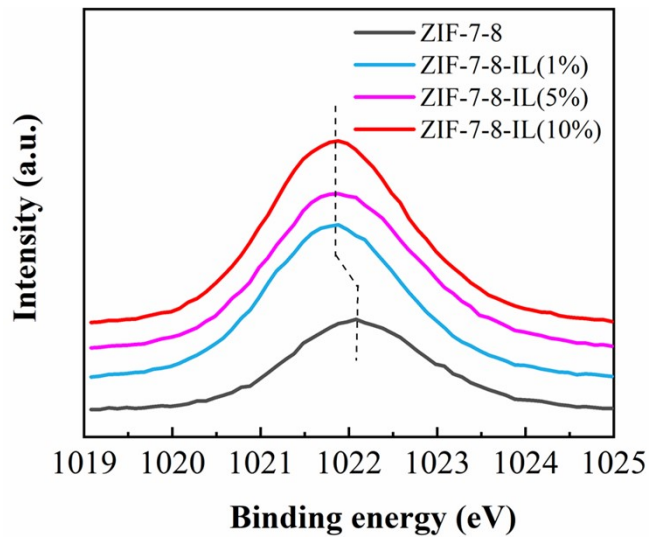

**Fig. S3** Zn 2p<sub>3/2</sub> XPS spectra of ZIF-7-8 and ZIF-7-8-IL.

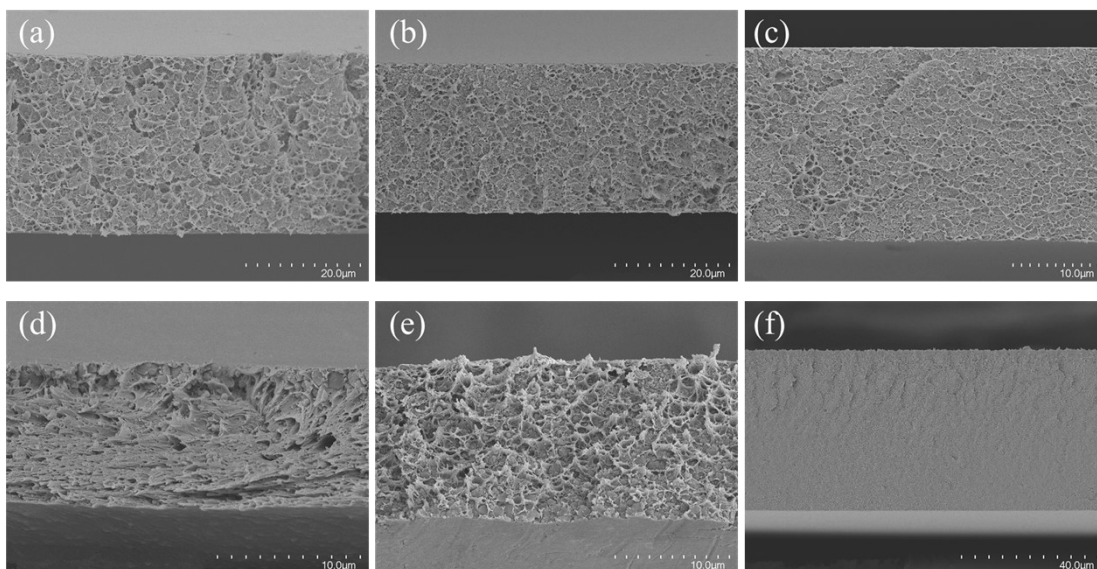

**Fig. S4** SEM cross-section images of (a) 10%ZIF-7-8/PI, (b) 20%ZIF-7-8/PI, (c) 25%ZIF-7-8/PI, (d) 10%ZIF-7-8-IL (1%)/PI, (e) 20%ZIF-7-8-IL (10%)/PI, and (f) 25%ZIF-7-8-IL (10%)/PI

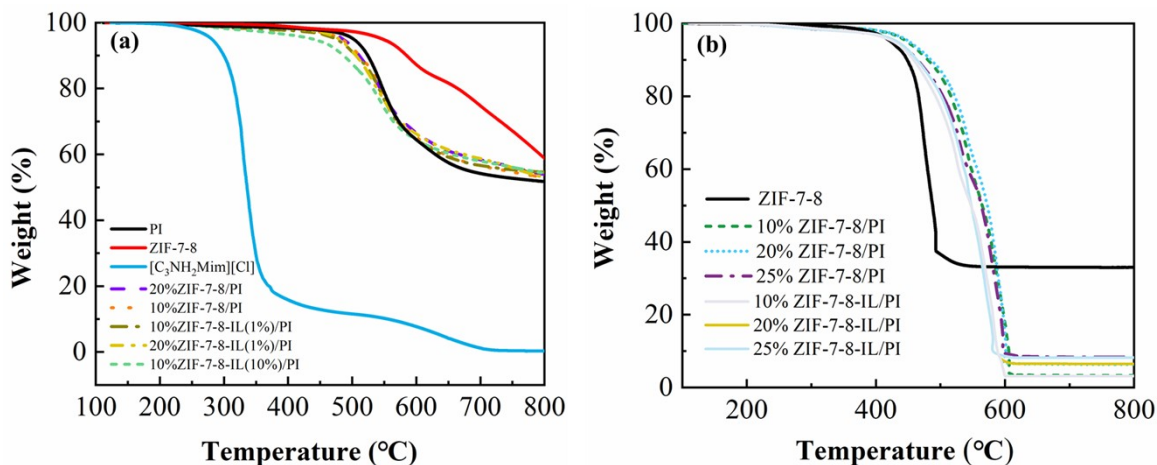

**Fig. S5** TGA curves of ZIF-7-8 nanoparticles, [AEMim][Cl], and various membranes in the nitrogen (a) and air (b) atmosphere

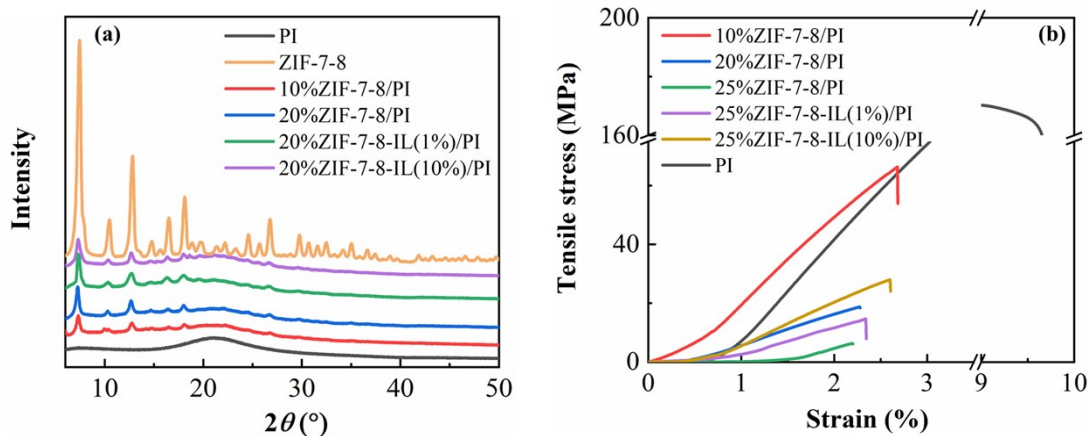

**Fig.S6** (a) WAXD patterns and (b) tensile properties of pristine PI, ZIF-7-8/PI and ZIF-7-8-IL/PI MMMs

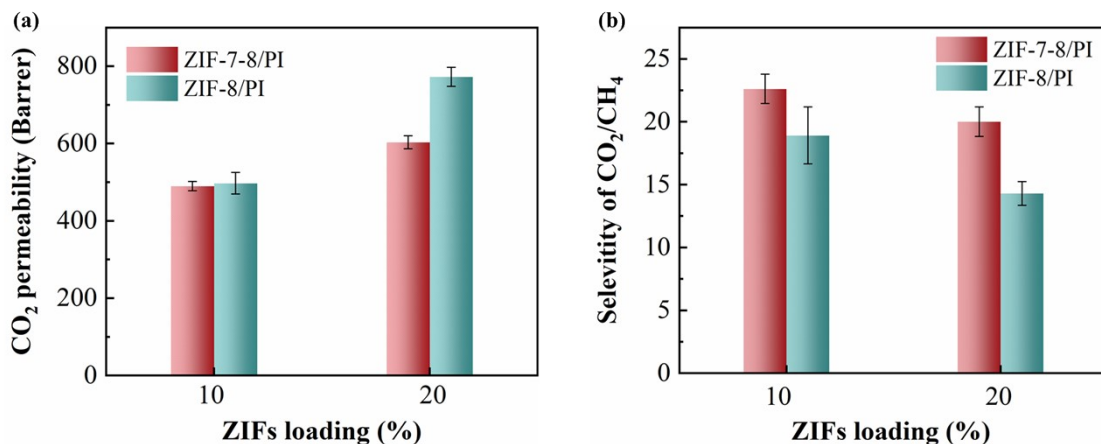

**Fig. S7** Pure-gas (a) CO<sub>2</sub> permeabilities and (b) CO<sub>2</sub>/CH<sub>4</sub> selectivities of ZIF-7-8/PI and ZIF-8/PI MMMs with different ZIFs mass loadings.

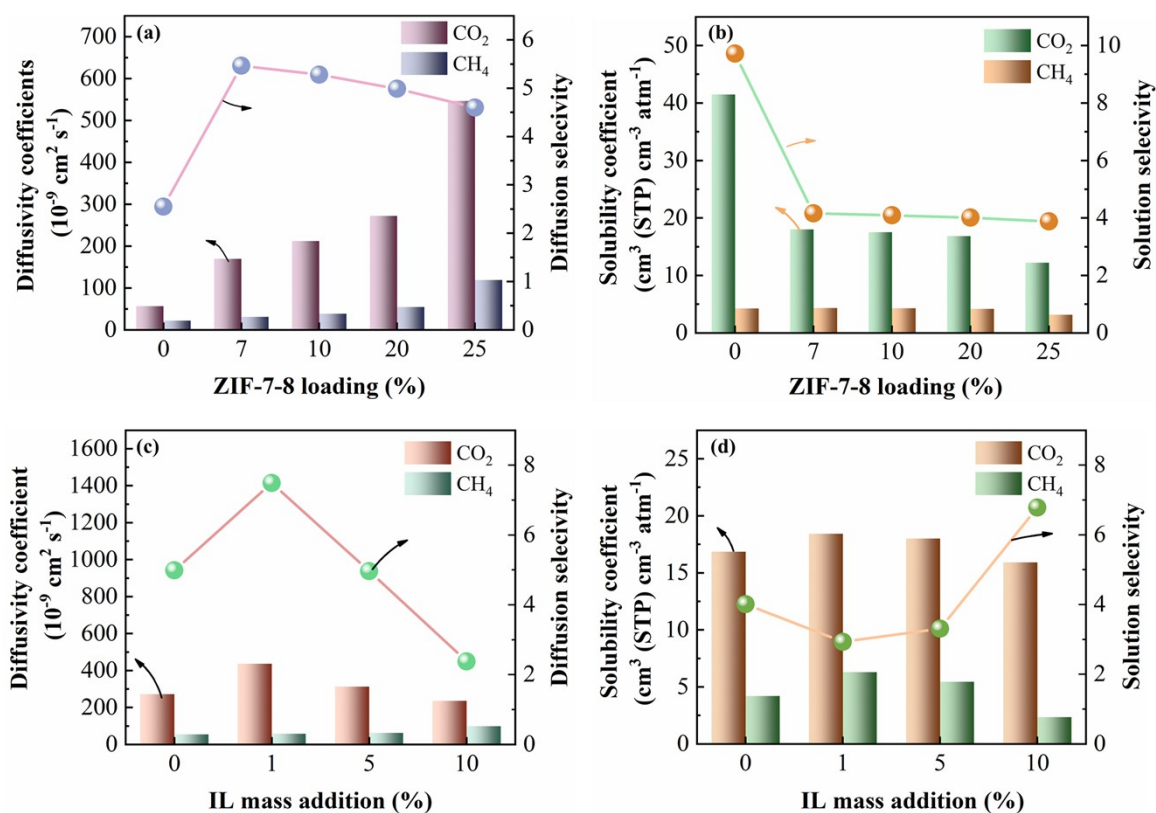

**Fig. S8** Diffusivity coefficients ( $D$ ), solubility coefficients ( $S$ ) and their selectivities for (a), (b) ZIF-7-8/PI MMMs as a function of ZIF-7-8 mass loading, and (c), (d) 20%ZIF-7-8-IL/PI MMMs with different IL loadings.

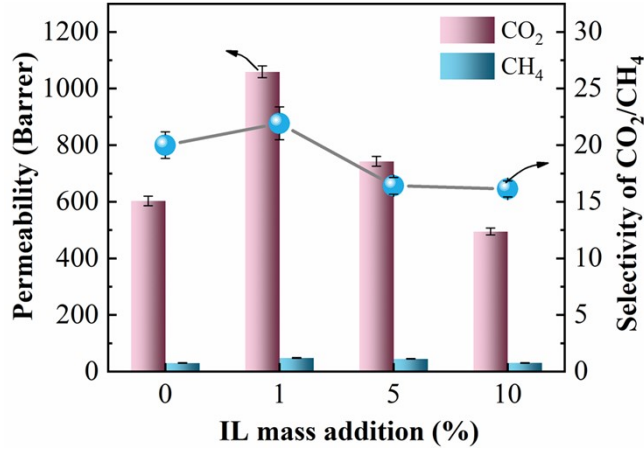

**Fig. S9** Pure-gas separation properties of 20%ZIF-7-8-IL/PI MMMs as a function of IL mass loading.

**Table S1** EXAFS fitting parameters at the Zn K-edge for various samples

| Sample                  | Shell       | CN <sup>a</sup> | R(Å) <sup>b</sup> | σ <sup>2</sup> (Å <sup>2</sup> ) <sup>c</sup> | ΔE <sub>0</sub> (eV) <sup>d</sup> | R factor      |
|-------------------------|-------------|-----------------|-------------------|-----------------------------------------------|-----------------------------------|---------------|
| Zn foil                 | Zn-Zn1      | 6*              | 2.64±0.02         | 0.0093±0.0006                                 | 6.8±0.4                           | 0.0006        |
|                         | Zn-Zn2      | 6*              | 2.77±0.03         | 0.0084±0.0039                                 | 8.1±1.6                           |               |
| ZnO                     | Zn-O        | 3.8±1.0         | 1.97±0.03         | 0.0030±0.0025                                 | 3.7±1.5                           | 0.0157        |
|                         | Zn-O-Zn     | 11.6±1.6        | 3.23±0.04         | 0.0039±0.0022                                 | 2.2±1.2                           |               |
| ZnPc                    | Zn-N        | 3.8±0.8         | 1.98±0.02         | 0.0020±0.0019                                 | 3.6±1.8                           | 0.0100        |
| <b>ZIF-7-8</b>          | <b>Zn-N</b> | <b>4.1±1.4</b>  | <b>1.98±0.02</b>  | <b>0.0033±0.0027</b>                          | <b>4.2±0.6</b>                    | <b>0.0102</b> |
| <b>ZIF-7-8-IL (1%)</b>  | <b>Zn-N</b> | <b>4.5±0.7</b>  | <b>1.99±0.02</b>  | <b>0.0103±0.0026</b>                          | <b>5.2±0.8</b>                    | <b>0.0117</b> |
| <b>ZIF-7-8-IL (10%)</b> | <b>Zn-N</b> | <b>4.6±1.0</b>  | <b>1.99±0.01</b>  | <b>0.0041±0.0021</b>                          | <b>2.9±0.7</b>                    | <b>0.0121</b> |

<sup>a</sup>CN, coordination number; <sup>b</sup>R, the distance between absorber and backscatter atoms; <sup>c</sup>σ<sup>2</sup>, Debye-Waller factor to account for thermal and structural disorders; <sup>d</sup>ΔE<sub>0</sub>, inner potential correction; R factor indicates the goodness of the fit. S<sub>0</sub><sup>2</sup> was fixed to 0.74, according to the experimental EXAFS fit of Zn foil by fixing CN as the known crystallographic value. FA reasonable range of EXAFS fitting parameters: 0.700 < S<sub>0</sub><sup>2</sup> < 1.000; CN > 0; σ<sup>2</sup> > 0 Å<sup>2</sup>; |ΔE<sub>0</sub>| < 10 eV; R factor < 0.02.

**Table S2** BET surface areas, pore volumes and average pore width of ZIF-7-8 and ZIF-7-8-IL nanoparticles

|                  | BET surface area/(m <sup>2</sup> /g) | Pore volume(V-t)/(m <sup>3</sup> /g) | Average pore width/nm |
|------------------|--------------------------------------|--------------------------------------|-----------------------|
| ZIF-8            | 1612                                 | 0.583                                | 0.643                 |
| ZIF-7-8          | 1084                                 | 0.369                                | 0.638                 |
| ZIF-7-8-IL (1%)  | 985                                  | 0.341                                | 0.663                 |
| ZIF-7-8-IL (5%)  | 885                                  | 0.314                                | 0.643                 |
| ZIF-7-8-IL (10%) | 419                                  | 0.146                                | 0.648                 |

**Table S3** The mechanical properties of the pristine PI membrane and MMMs

| Membrane              | Elastic modulus (MPa) | Breaking elongation strain (%) | Tensile break stress (MPa) | Tensile strength (MPa) |
|-----------------------|-----------------------|--------------------------------|----------------------------|------------------------|
| Pristine PI           | 3579.39               | 9.78                           | 123.45                     | 170.45                 |
| 10%ZIF-7-8/PI         | 3141.87               | 2.68                           | 53.89                      | 66.32                  |
| 20%ZIF-7-8/PI         | 1129.08               | 2.28                           | 18.39                      | 18.76                  |
| 25%ZIF-7-8/PI         | 906.30                | 2.20                           | 6.17                       | 6.38                   |
| 25%ZIF-7-8-IL(1%)/PI  | 1743.71               | 2.35                           | 7.90                       | 14.73                  |
| 25%ZIF-7-8-IL(10%)/PI | 2129.94               | 2.61                           | 24.10                      | 28.00                  |

**Table S4** Mixed-gas permeabilities and selectivities of 25%ZIF-7-8/PI and 25%ZIF-7-8-IL(1%)/PI MMMs using 50:50vol% CO<sub>2</sub>:CH<sub>4</sub> feed at 35 °C.

| Feed pressure/bar | 25%ZIF-7-8/PI             |                           |             | 25%ZIF-7-8-IL(1%)/PI      |                           |             |
|-------------------|---------------------------|---------------------------|-------------|---------------------------|---------------------------|-------------|
|                   | P <sub>CO2</sub> (Barrer) | P <sub>CH4</sub> (Barrer) | Selectivity | P <sub>CO2</sub> (Barrer) | P <sub>CH4</sub> (Barrer) | Selectivity |
| 4                 | 728                       | 33                        | 22          | 1166                      | 49                        | 24          |
| 8                 | 640                       | 32                        | 20          | 1013                      | 46                        | 22          |
| 12                | 620                       | 32                        | 19          | 1066                      | 55                        | 21          |
| 16                | 568                       | 30                        | 19          | 1096                      | 58                        | 20          |
| 20                | 466                       | 25                        | 19          | 1167                      | 63                        | 19          |

**Table S5** CO<sub>2</sub> permeabilities and CO<sub>2</sub>/CH<sub>4</sub> selectivities of ZIF-7-8-IL/PI MMMs in this work and other reported MMMs

| MOF-based filler  | Polymer     | Test condition                                               | CO <sub>2</sub> permeability(Barrer ) | CO <sub>2</sub> /CH <sub>4</sub> selectivity | Ref.      |
|-------------------|-------------|--------------------------------------------------------------|---------------------------------------|----------------------------------------------|-----------|
| 0                 |             |                                                              | 308                                   | 25                                           |           |
| 10%ZIF-7-8        |             |                                                              | 490                                   | 23                                           |           |
| 20%ZIF-7-8        |             |                                                              | 603                                   | 20                                           |           |
| 25%ZIF-7-8        |             | 35 °C, 2 bar                                                 | 865                                   | 18                                           |           |
| 10%ZIF-7-8-IL(1%) | 6FDA-DAM-PI |                                                              | 879                                   | 25                                           | This work |
| 20%ZIF-7-8-IL(1%) |             |                                                              | 1060                                  | 22                                           |           |
| 25%ZIF-7-8-IL(1%) |             |                                                              | 1206                                  | 21                                           |           |
| 25%ZIF-7-8-IL(1%) |             | 35 °C, 4 bar, CO <sub>2</sub> /CH <sub>4</sub> (50/50 vol%)  | 1166                                  | 24                                           |           |
| 25%ZIF-7-8-IL(1%) |             | -45 °C, 4 bar, CO <sub>2</sub> /CH <sub>4</sub> (50/50 vol%) | 1060                                  | 66                                           |           |
| Enhancement(%)    |             |                                                              | <b>59~292</b>                         | <b>-12~164</b>                               |           |
| 0                 |             |                                                              | 9                                     | 35                                           |           |
| 30%ZIF-8          | Matrimid    | 35 °C, 3.5 bar                                               | 38                                    | 21                                           | [19]      |
| 40%ZIF-8          |             |                                                              | 100                                   | 12                                           |           |
| 30%ZIF-8-DA       |             |                                                              | 19                                    | 36                                           |           |



|                        |               |              |                  |                   |      |
|------------------------|---------------|--------------|------------------|-------------------|------|
| 40%ZIF-8-DA            |               |              | 22               | 20                |      |
| 30%ZIF-8-DA            |               |              | 16               | 40.6              |      |
| 40%ZIF-8-DA            |               |              | 18               | 34.3              |      |
| <b>Enhancement(%)</b>  |               |              | <b>77~1011</b>   | <b>-67~16</b>     |      |
| 0                      |               |              | 200              | 22                |      |
| 6%ZIF-8                | PSF           | 30 °C, 6 bar | 427              | 19                | [24] |
| [BMIM][Tf2N]/ZIF-8(6%) |               |              | 307              | 38.3              |      |
| <b>Enhancement(%)</b>  |               |              | <b>54~114</b>    | <b>-13.6~74.1</b> |      |
| 0                      |               |              | 71 <sup>a</sup>  | 18 <sup>a</sup>   |      |
| 15%ZIF-8               | Pebax-1657    | 25 °C, 1 bar | 125 <sup>a</sup> | 19 <sup>a</sup>   | [36] |
| [bmim][Tf2N]@ZIF-8-15% |               |              | 100 <sup>a</sup> | 35 <sup>a</sup>   |      |
| <b>Enhancement(%)</b>  |               |              | <b>41~76-</b>    | <b>6~94</b>       |      |
| 0                      |               |              | 285              | 35                |      |
| ZIF-8(7%)              | TBDA2-6FDA-PI | 1 bar, 35 °C | 560              | 27                | [50] |
| ZIF-8(20%)             |               |              | 896              | 21                |      |
| ZIF-8(30%)             |               |              | 1437             | 16                |      |

|                           |             |                                                                 |                  |                 |      |
|---------------------------|-------------|-----------------------------------------------------------------|------------------|-----------------|------|
| ZIF-8@PD(7%)              |             |                                                                 | 380              | 25              |      |
| ZIF-8@PD(20%)             |             |                                                                 | 702              | 23              |      |
| ZIF-8@PD(30%)             |             |                                                                 | 1056             | 20              |      |
| ZIF-8@PD-PI<br>(20%)      |             | 1 bar, 35 °C, CO <sub>2</sub> /CH <sub>4</sub> (50/50 vol%)     | 630              | 23              |      |
| <b>Enhancement(%)</b>     |             |                                                                 | <b>270~402</b>   | <b>-34~54</b>   |      |
| 0                         |             |                                                                 | 88 <sup>a</sup>  | 21 <sup>a</sup> |      |
| 30%ZIF-8                  |             | 35 °C and 4 bar                                                 | 277 <sup>a</sup> | 3 <sup>a</sup>  |      |
| 30%ZIF-8@PDA              |             |                                                                 | 195 <sup>a</sup> | 18 <sup>a</sup> |      |
| 50%ZIF-8@PDA              | TB          |                                                                 | 260 <sup>a</sup> | 16 <sup>a</sup> | [51] |
| 30%ZIF-8@PDA              |             | 35 °C and 4 bar, 50:50 vol%<br>CO <sub>2</sub> :CH <sub>4</sub> | 180 <sup>a</sup> | 23 <sup>a</sup> |      |
| 50%ZIF-8@PDA              |             |                                                                 | 262 <sup>a</sup> | 21 <sup>a</sup> |      |
| <b>Enhancement(%)</b>     |             |                                                                 | <b>105~214</b>   | <b>-86~8.7</b>  |      |
| 0                         |             |                                                                 | 826              | 17              |      |
| 40%UiO-66-NH <sub>2</sub> | 6FDA-DAM-PI | 35 °C, 3 bar                                                    | 2474             | 13              | [52] |
| <b>Enhancement(%)</b>     |             |                                                                 | <b>199</b>       | <b>-23</b>      |      |
| 0                         | PIM-1       | 35 °C, 3.5 bar                                                  | 3874             | 17.6            | [54] |

|                                   |            |                                                                |                  |                  |      |
|-----------------------------------|------------|----------------------------------------------------------------|------------------|------------------|------|
| 0.1-ZIF-8                         |            |                                                                | 6338             | 18.8             |      |
| 0.1-ZIF-8                         |            | 35 °C, 3.5 atm, 40:60 mol%<br>CO <sub>2</sub> /CH <sub>4</sub> | 6186             | 16.5             |      |
| <b>Enhancement(%)</b>             |            |                                                                | <b>0.60~0.64</b> | <b>-6.25~6.8</b> |      |
| 0                                 |            |                                                                | 390              | 24               |      |
| 15%ZIF-90                         | 6FDA-DAM   | 25 °C, 2 bar, 1:1 CO <sub>2</sub> /CH <sub>4</sub> mixture     | 720              | 37               | [53] |
| <b>Enhancement(%)</b>             |            |                                                                | <b>85</b>        | <b>54</b>        |      |
| 0                                 |            |                                                                | 7062             | 6.3              |      |
| 10%UiO-66-<br>NH <sub>2</sub> @IL | PIM-1      | 20 °C, 1 bar                                                   | 8283             | 12.3             | [55] |
| <b>Enhancement(%)</b>             |            |                                                                | <b>17</b>        | <b>95</b>        |      |
| 0                                 |            |                                                                | 21               | 4.6              |      |
| 10-N-HKUST-1                      |            |                                                                | 11               | 4.1              |      |
| 30-N-HKUST-1                      |            |                                                                | 9                | 4.9              |      |
| 50-N-HKUST-1                      | PEI        | 25 °C and 1.5 bar.                                             | 19               | 4.7              | [56] |
| 30-M-HKUST-1                      |            |                                                                | 46               | 2.7              |      |
| <b>Enhancement(%)</b>             |            |                                                                | <b>-57~119</b>   | <b>-70~7</b>     |      |
| 0                                 | ODPA-TMPDA | 25 °C and 1 bar.                                               | 112              | 36               | [57] |

|                       |                 |              |
|-----------------------|-----------------|--------------|
| 30%ZIF-8              | 316             | 33           |
| 2%ns-CuBDC            | 99              | 43           |
| 20%ZIF-8+2%ns-CuBDC   | 177             | 42           |
| <b>Enhancement(%)</b> | <b>11.6~182</b> | <b>-8~19</b> |

Enhancement(%) refers to the percentage of improvement range of CO<sub>2</sub> permeability and the CO<sub>2</sub>/CH<sub>4</sub> selectivity compared to the pristine polymer. <sup>a</sup> Values are approximated from plots.
